# Supplementary material
Source: PubMed Central journal article supplement (PMC7856530)
Supplement: mmc1.pdf [file mmc1.pdf]

# The Effect of Tumor Size and Histologic Findings on Outcomes After Segmentectomy vs Lobectomy for Clinically Node-Negative Non-Small Cell Lung Cancer

*Vignesh Raman, MD, MHS; Oliver K. Jawitz, MD, MHS; Soraya L. Voigt, MD;  
Kristen E. Rhodin, MD; Thomas A. D'Amico, MD; David H. Harpole, MD;  
Chi-Fu Jeffrey Yang, MD; and Betty C. Tong, MD, MHS*

CHEST 2021; 159(1):390-400

*Online supplements are not copyedited prior to posting and the author(s) take full responsibility for the accuracy of all data.*

© 2020 AMERICAN COLLEGE OF CHEST PHYSICIANS. Reproduction of this article is prohibited without written permission from the American College of Chest Physicians. See online for more details. DOI: 10.1016/j.chest.2020.06.066

**e-Figure 1.**

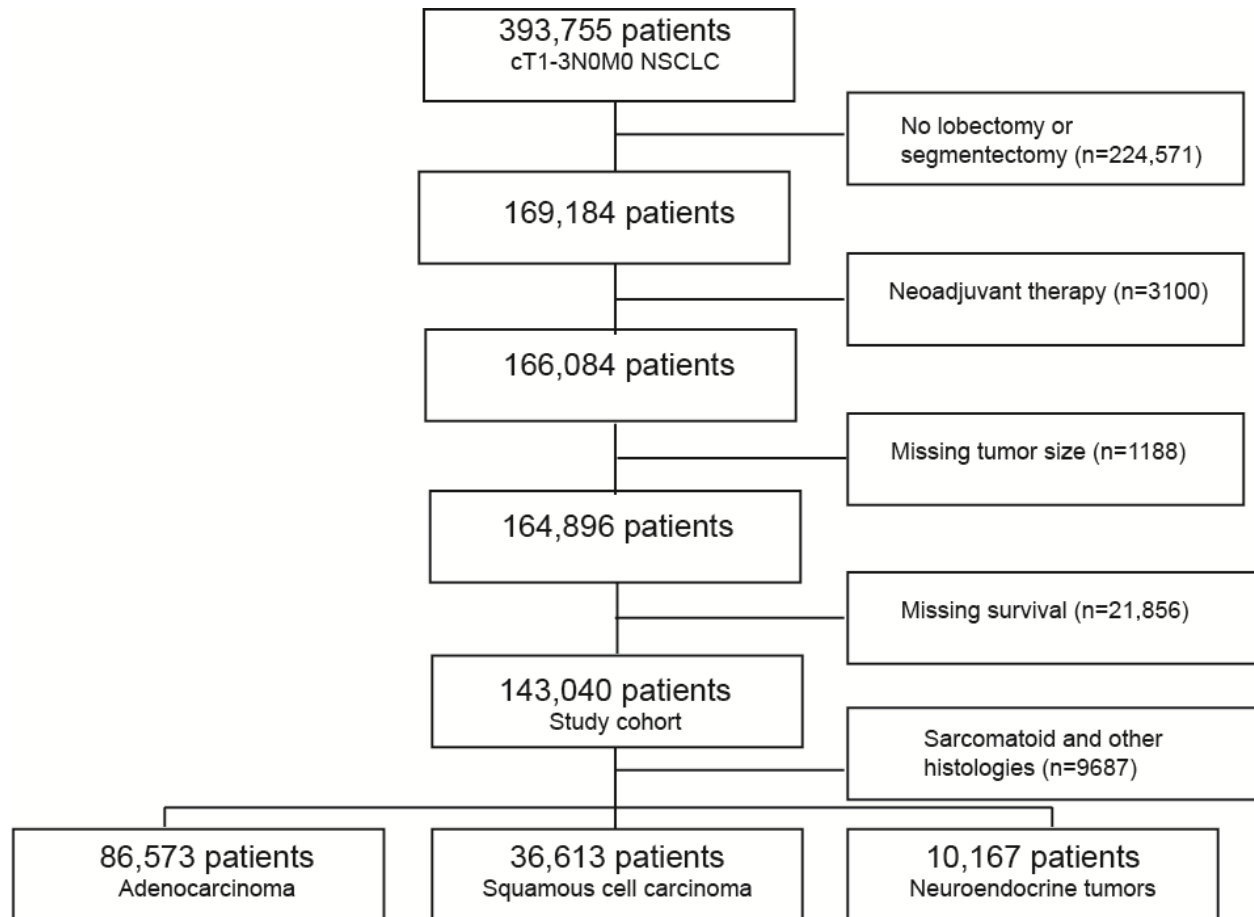

**e-Figure 2.**

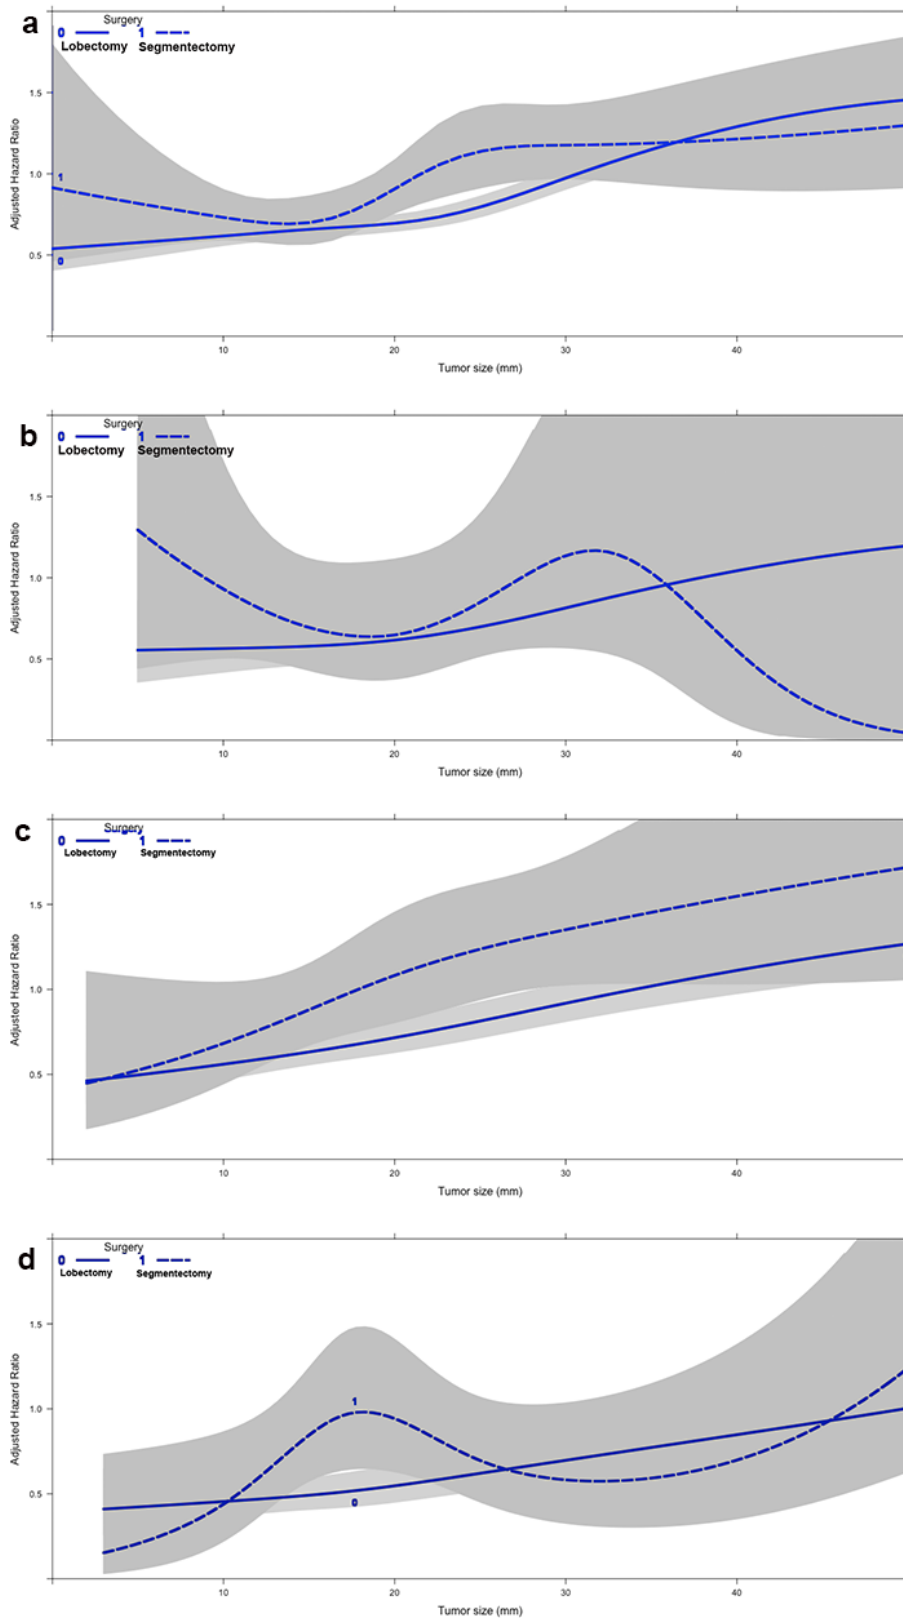

**e-Table 1.** Summary of sensitivity analyses in patients with adenocarcinoma or squamous cell carcinoma. The table below reflects data from multivariable Cox proportional hazards models in cohorts divided by tumor size based on thresholds identified in the central analyses. Each row represents a unique regression analysis. The models were adjusted for age, sex, race/ethnicity, year of diagnosis, Charlson-Deyo score, insurance status, treatment at an academic center, annualized center surgical volume, identity of lobe, tumor size, and type of surgery

| <b>Cohort</b>                  | <b>Cohort Size</b> | <b>Adjusted Hazard Ratio for Segmentectomy (reference: lobectomy)</b> | <b>95% Confidence Interval</b> | <b>p-value</b> |
|--------------------------------|--------------------|-----------------------------------------------------------------------|--------------------------------|----------------|
| <b>Adenocarcinoma</b>          |                    |                                                                       |                                |                |
| <10 mm                         | 3223               | 1.19                                                                  | 0.94-1.50                      | 0.14           |
| ≥10 mm                         | 83360              | 1.16                                                                  | 1.10-1.23                      | <0.001         |
| <b>Squamous cell carcinoma</b> |                    |                                                                       |                                |                |
| <15 mm                         | 3944               | 1.19                                                                  | 0.99-1.43                      | 0.06           |
| ≥15 mm                         | 32676              | 1.17                                                                  | 1.08-1.26                      | <0.001         |
